# Supplementary material for: Catecholase and phenoxazinone synthase activities of a ferromagnetically coupled tetranuclear Cu(ii) complex
Source: Royal Society of Chemistry journal article supplement (doi:10.1039/c6ra11433d), 2016-01-01
Supplement: c6ra11433d1.pdf [file c6ra11433d1.pdf]

## Electronic Supporting Information

### Catecholase and phenoxazinone synthase activities of a ferromagnetically coupled tetranuclear Cu(II) complex

Merry Mitra,<sup>a</sup> Tanay Kundu,<sup>b,#</sup> Gurpreet Kaur,<sup>c,§</sup> Gyaneswar Sharma,<sup>d</sup> Angshuman Roy Choudhury,<sup>c</sup> Yogesh Singh<sup>d</sup> and Rajarshi Ghosh<sup>a,\*</sup>

---

<sup>a</sup>. Department of Chemistry, The University of Burdwan, Burdwan 713 104, India

\*E-mail: rghosh@chem.buruniv.ac.in.

<sup>b</sup>. Physical/Materials Chemistry Division, National Chemical Laboratory, Pune 411 008, India; <sup>#</sup>Present address: Institut Lavoisier, UMR CNRS 8180, Université de Versailles Saint-Quentin-en-Yvelines, 45 avenue des Etats-Unis, 78035 Versailles cedex, France.

<sup>c</sup>. Department of Chemical Sciences, Indian Institute of Science Education & Research, Mohali, Sector 81, S.A.S. Nagar, Knowledge City, Manauli PO, Mohali 140 306, India; <sup>§</sup>Present address: Department of Chemistry, DAV University, Jalandhar, Punjab 144 012, India.

<sup>d</sup>. Department of Physical Sciences, Indian Institute of Science Education & Research, Mohali, Sector 81, S.A.S. Nagar, Knowledge City, Manauli PO, Mohali 140 306, India

## CONTENTS

---

|                             |                                                                                                                                            |
|-----------------------------|--------------------------------------------------------------------------------------------------------------------------------------------|
| <b>Figure. S1</b> .....     | H <sup>1</sup> NMR spectrum of 3,5-di- <i>tert</i> -butylquinone                                                                           |
| <b>Figure. S2</b> .....     | Change in spectral pattern of complex <b>1</b> in dichloromethane after reaction with 3,5-DTBC, observing the reaction for 4 h             |
| <b>Figure. S3</b> .....     | A plot of the difference in absorbance ( $\Delta A$ ) vs time to evaluate the rate of catalysis of 3,5-DTBC by <b>1</b> in dichloromethane |
| <b>Figure. S4</b> .....     | Plot of rate vs. [substrate] (3,5-DTBC) in presence of <b>1</b> in DCM; inset: Lineweaver-Burk plot                                        |
| <b>Figure. S5 (a)</b> ..... | ESI-MS spectrum of complex <b>1</b>                                                                                                        |
| <b>Figure. S5 (b)</b> ..... | ESI-MS spectrum of the 1:100 mixture of <b>1</b> and 3,5-DTBC                                                                              |
| <b>Figure. S6</b> .....     | EPR spectrum of 1:100 mixture of <b>1</b> and 3,5-DTBC indicating the formation of semiquinone                                             |
| <b>Figure. S7</b> .....     | HRMS spectrum of 1:100 mixture of <b>1</b> and OAPH indicating the formation of APX                                                        |
| <b>S1</b> .....             | Spectrophotometric detection of H <sub>2</sub> O <sub>2</sub> in the oxidation reaction                                                    |

---

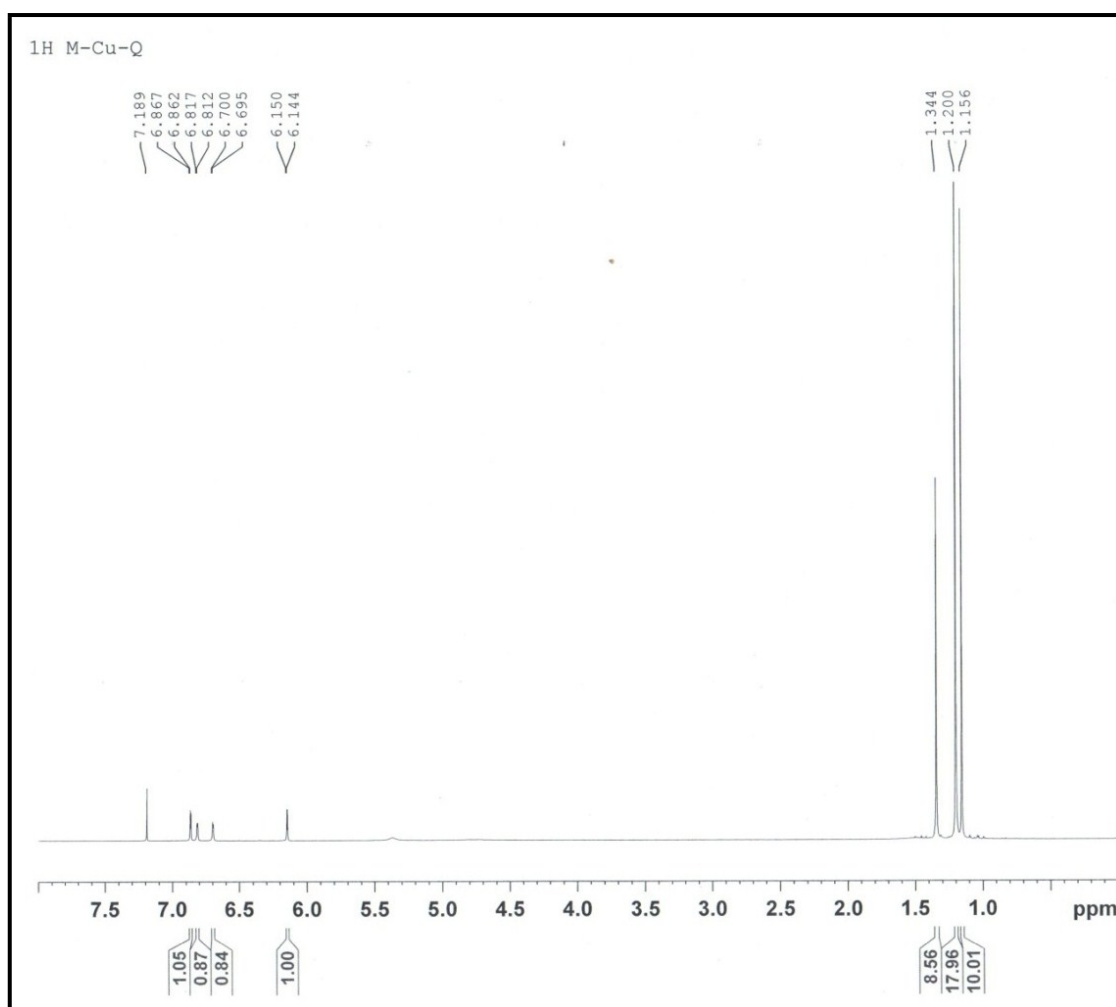

**Figure. S1.**  $^1\text{H}$  NMR Spectrum of 3,5-di-*tert*-butylquinone

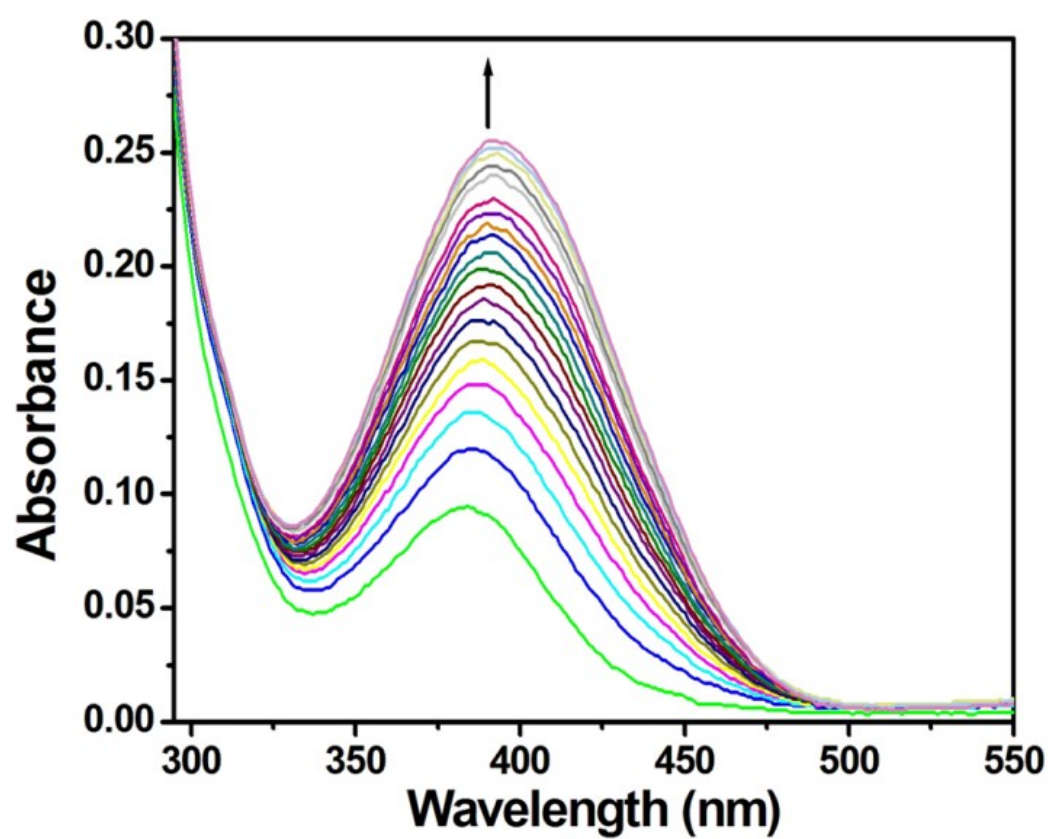

**Figure S2.** Change in spectral pattern of complex **1** in dichloromethane after reaction with 3,5-DTBC, observing the reaction for 4 h. This experiment was carried for 4 h due to high volatility of dichloromethane. The repetitive spectra were obtained in 9 min interval at room temperature. The peak for the coloured product (3,5-DTBQ) appears at ~390 nm which gradually shifts to 401 nm.<sup>22</sup>

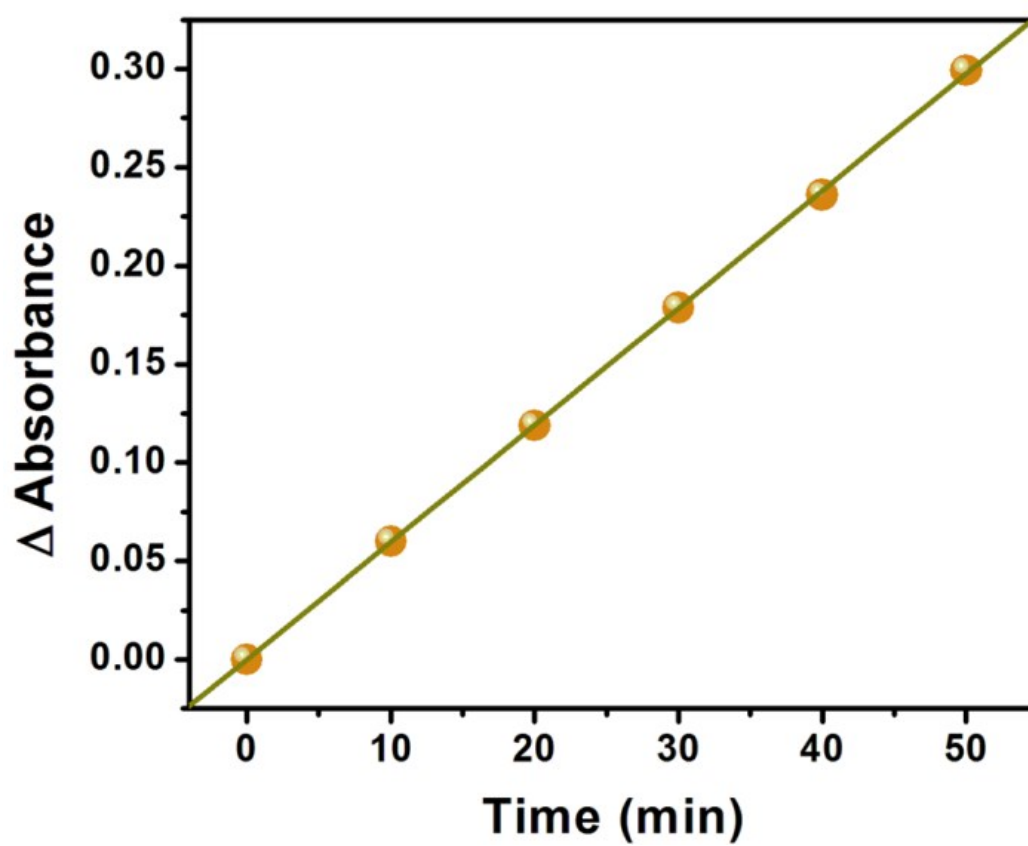

**Figure S3.** A plot of the difference in absorbance ( $\Delta A$ ) vs time to evaluate the rate of catalysis of 3,5-DTBC by **1** in dichloromethane.

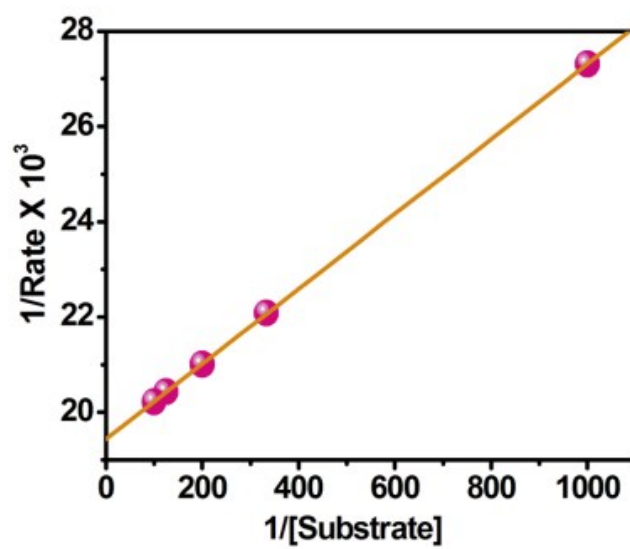



**Figure S4.** Plot of rate vs. [substrate] (3,5-DTBC) in presence of **1** in DCM; inset: Lineweaver-Burk plot.

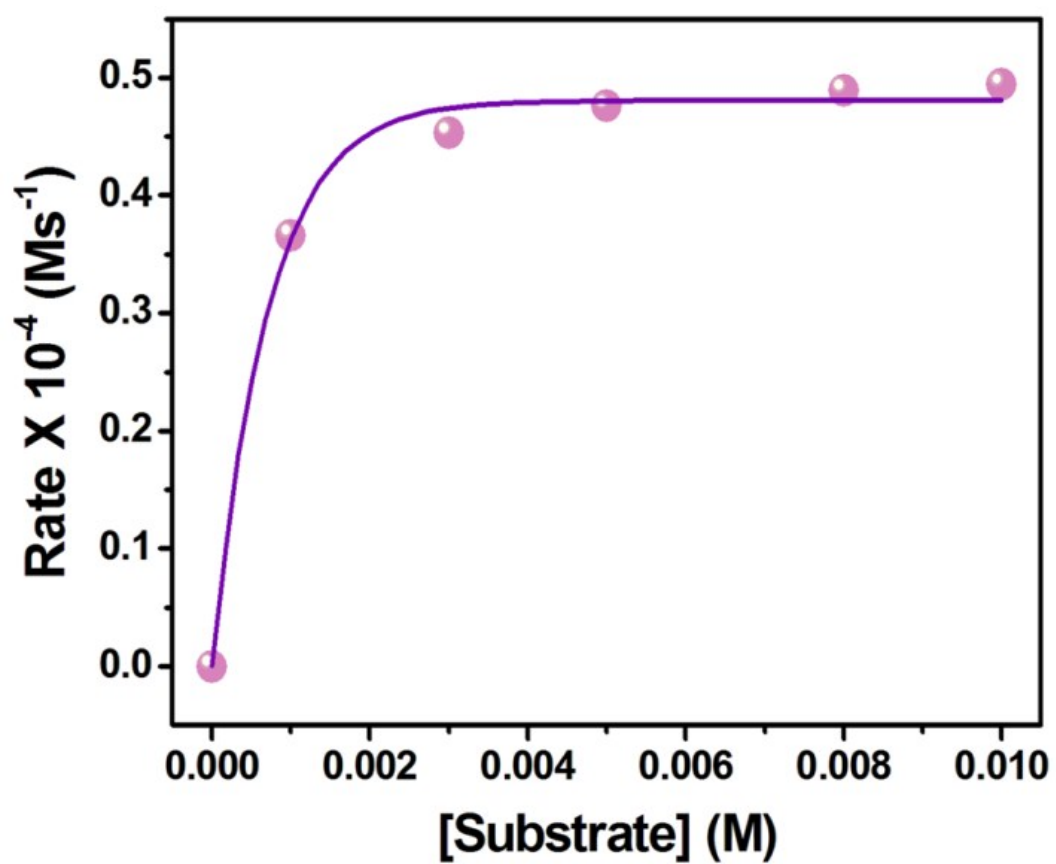

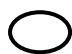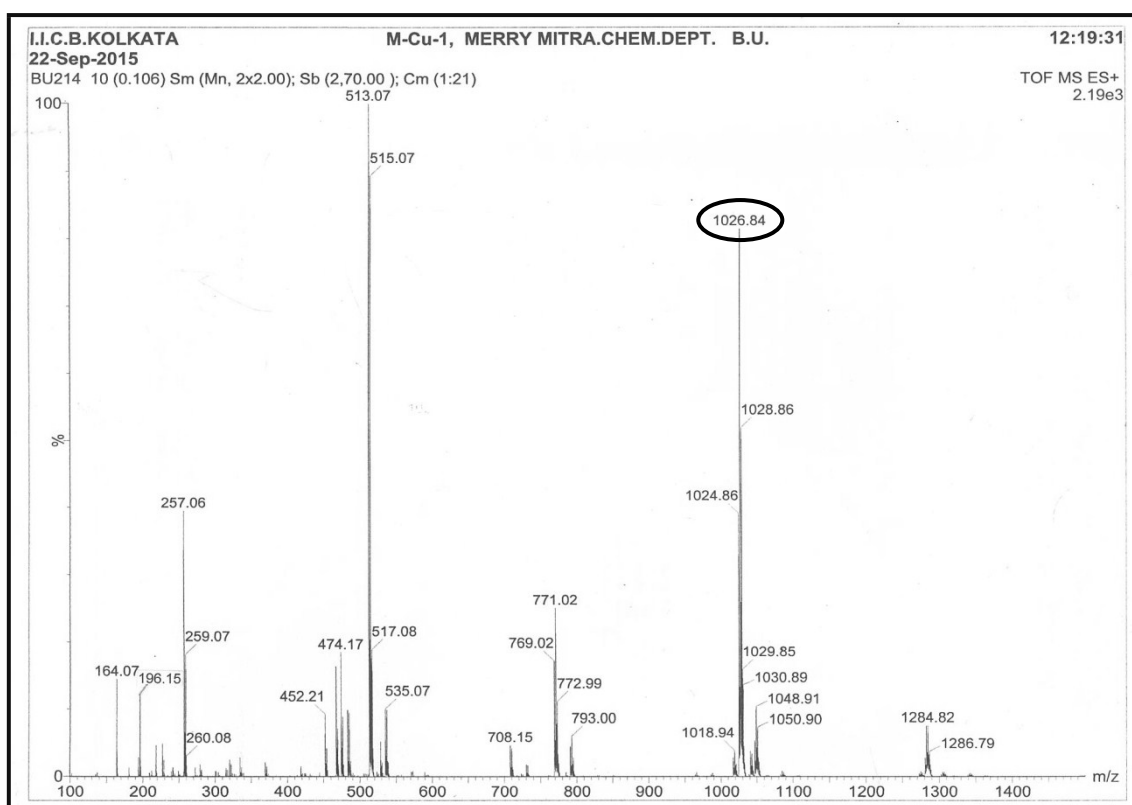

**Figure. S5 (a).** ESI-MS spectrum of complex **1** in MeOH

\*The mass difference of 41 ( $1068 - 1027 = 41$ ) in the molecular wt of the complex is due to  $\text{CH}_3\text{CN}$  (molecular wt = 41), which separates out in the solution state (indicated in the ESI mass spectrum,  $m/z = 1027$ ), which was previously in the crystal lattice in solid state (molecular wt = 1068).

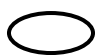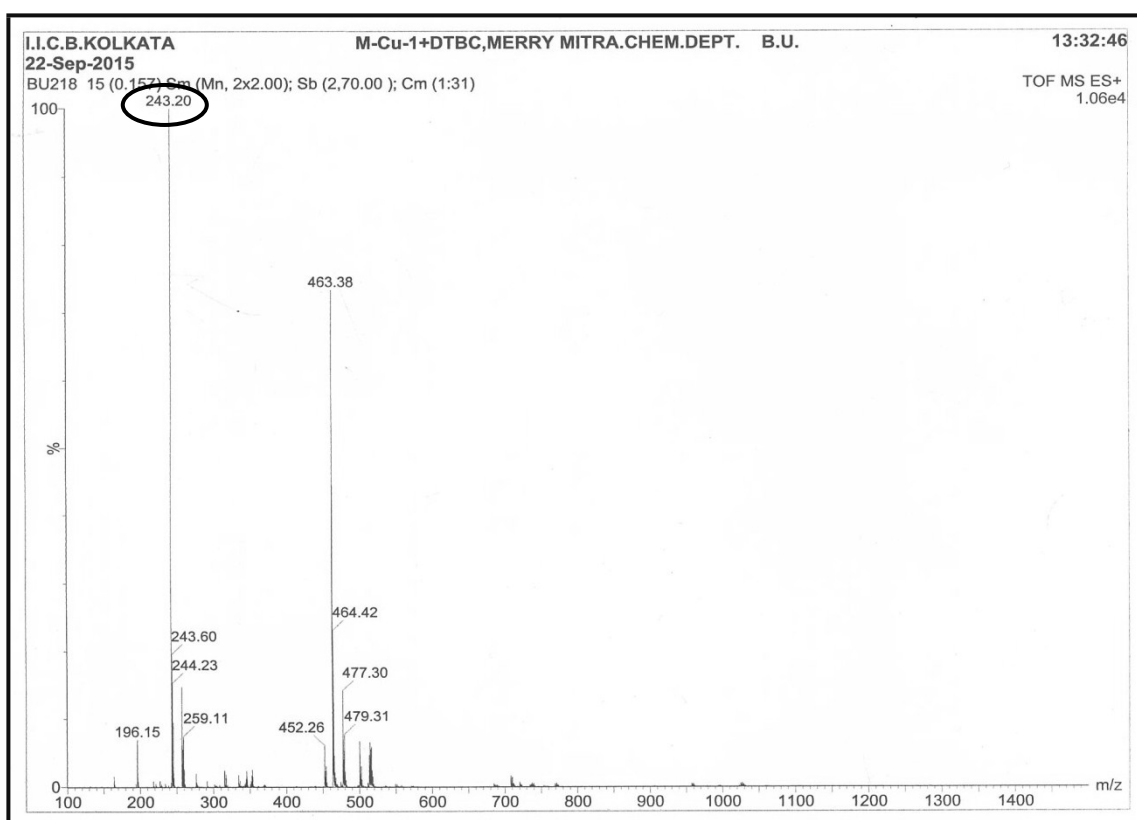

**Figure. S5 (b).** ESI-MS spectrum of the 1:100 mixture of **1** and 3,5-DTBC in MeOH

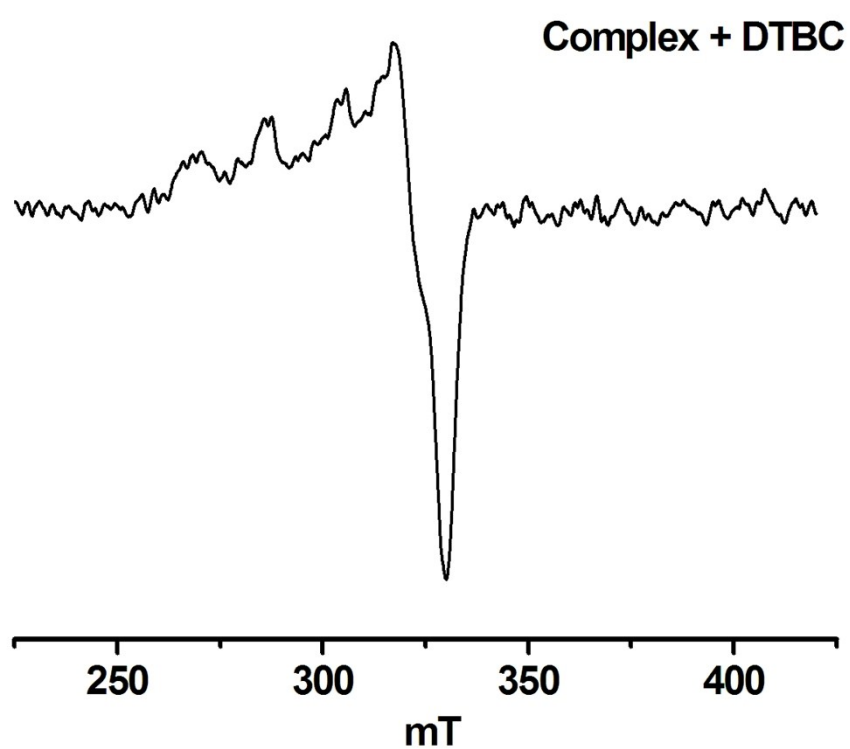

**Figure. S6.** EPR spectrum of 1:100 mixture of **1** and 3,5-DTBC indicating the formation of semiquinone

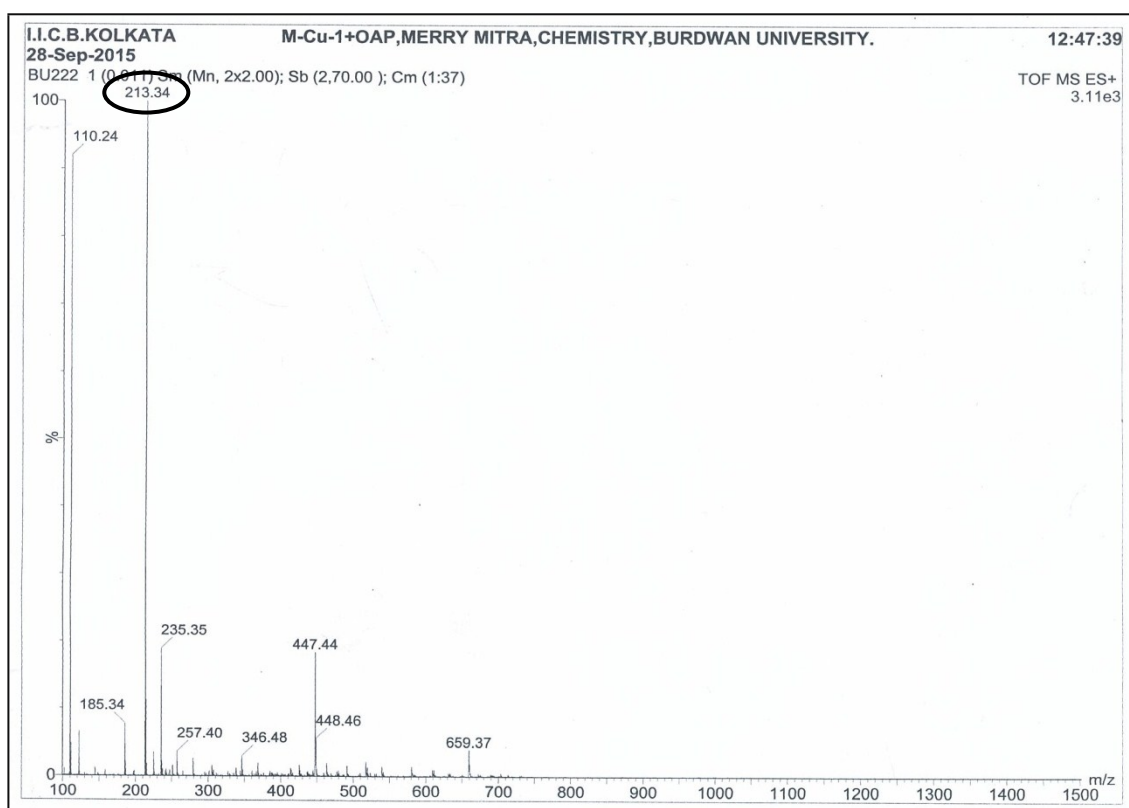

**Figure. S7.** HRMS spectrum of 1:100 mixture of **1** and OAPH in MeOH indicating the formation of APX

### S1. Spectrophotometric detection of H<sub>2</sub>O<sub>2</sub> in the oxidation reaction<sup>24</sup>

Reaction mixtures were prepared as in the kinetic experiments. After 1 h of reaction an equal volume of water was added and the quinone formed was extracted three times with dichloromethane. The aqueous layer was acidified with H<sub>2</sub>SO<sub>4</sub> to pH = 2 to stop further oxidation, and 1 mL of a 10% solution of KI and three drops of 3% solution of ammonium molybdate were added. In the presence of hydrogen peroxide occurs the reaction

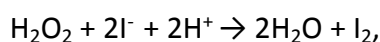

and with an excess of iodide ions, the triiodide ion is formed according to the reaction

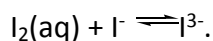

The formation of I<sub>3</sub><sup>-</sup> was monitored spectrophotometrically due to the development of the characteristic I<sub>3</sub><sup>-</sup> band ( $\lambda = 353 \text{ nm}$ ,  $\epsilon = 26000 \text{ M}^{-1} \text{ cm}^{-1}$ ).

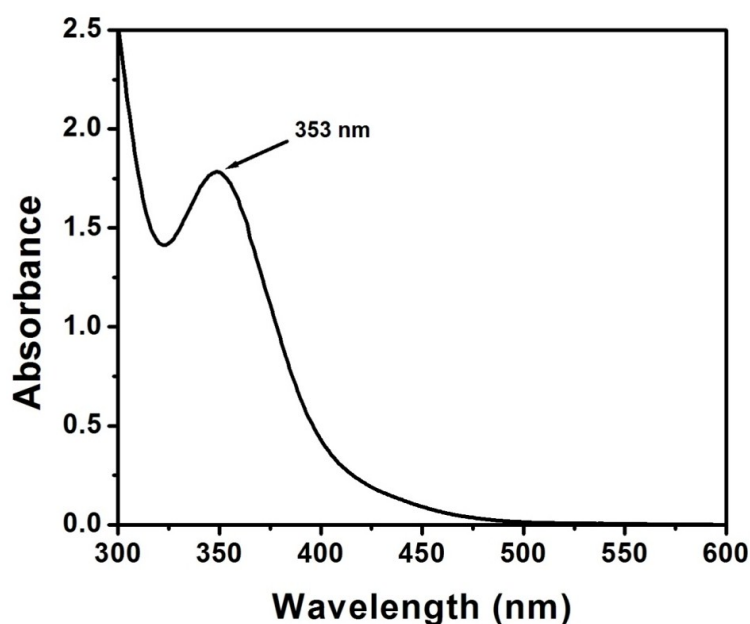

#### Blank experiments

Blank experiments were performed twice with identical reaction conditions as that described above in this section - (i) in presence of substrate only, in absence of the catalyst (Figure A) and (ii) in absence of both substrate and catalyst (Figure B). Fig. A indicates **no** appreciable formation of H<sub>2</sub>O<sub>2</sub>. A very small hump appears in the plot which is due the auto-

oxidation property of catechol in presence of air, leading to the formation of quinone, and liberating small amount of  $\text{H}_2\text{O}_2$ . Fig. B indicates no  $\text{H}_2\text{O}_2$  formation in absence of both catalyst and substrate, which implies the reagents were in pure form. **Identical scale is maintained for all the three plots.**

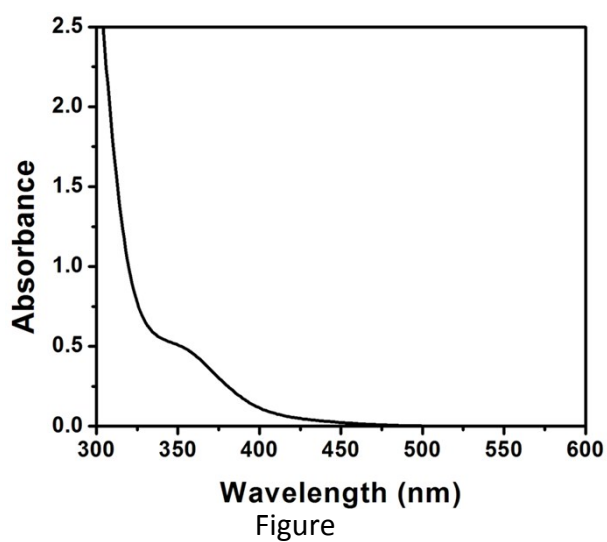

A

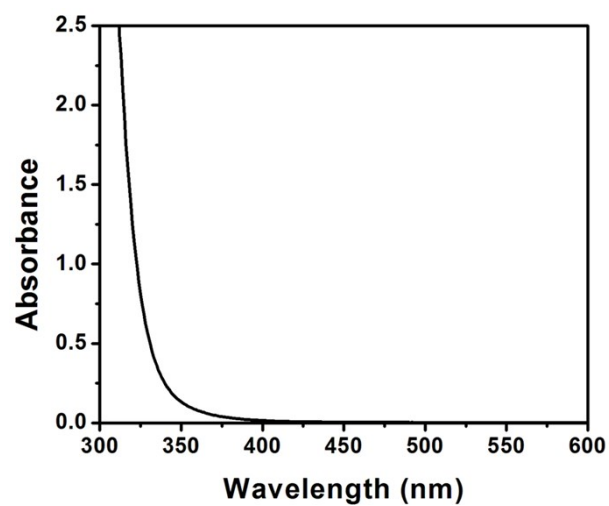

Figure B
